# Supplementary material for: Modulation of the coordination environment enhances the electrocatalytic efficiency of Mo single atoms toward water splitting
Source: Royal Society of Chemistry journal article supplement (doi:10.1039/d2ta01750d), 2022-01-01
Supplement: d2ta01750d1.pdf [file d2ta01750d1.pdf]

## Supporting Information

# Modulation of coordination environment enhances electrocatalytic efficiency of Mo single atoms toward water splitting

*Chih-Chieh Cheng,<sup>a</sup> Yong-Xian Yeh,<sup>a</sup> Yu-Chieh Ting,<sup>a</sup> Shin-Hong Lin,<sup>a</sup> Kotaro Sasaki,<sup>b</sup> YongMan Choi,<sup>c\*</sup> Shih-Yuan Lu<sup>a\*</sup>*

### *Affiliations:*

<sup>a</sup>Department of Chemical Engineering, National Tsing Hua University, Hsinchu 30013, Taiwan.

<sup>b</sup>Chemistry Department, Brookhaven National Laboratory, Upton, NY 11973, USA.

<sup>c</sup>College of Photonics, National Yang Ming Chiao Tung University, Tainan 71150, Taiwan.

*Email:* [ymchoi@nctu.edu.tw](mailto:ymchoi@nctu.edu.tw) (Y. Choi); [sylu@mx.nthu.edu.tw](mailto:sylu@mx.nthu.edu.tw) (S.-Y. Lu)

## Computational methods

All spin-polarized periodic density functional theory (DFT) calculations were performed using the Vienna Ab initio Simulation Package (VASP)<sup>1-2</sup> to systematically examine the HER activity of the three single-atom catalysts (SACs) of Mo-O<sub>2</sub>C<sub>2</sub>, Mo-O<sub>2</sub>N<sub>1</sub>C<sub>1</sub>, and Mo-O<sub>2</sub>N<sub>2</sub>. We used revised Perdew-Burke-Ernzerh (RPBE) functional<sup>3</sup> within the generalized gradient approximation (GGA) for modeling the exchange-correlation energy and the projector augmented plane wave (PAW) method<sup>4</sup> for describing ionic cores. The tetrahedron method with Blöchl corrections of  $\sigma = 0.05$  eV was employed, while 600 eV of the plane-wave cutoff energy was used. To prepare 2D-slab models for Mo-O<sub>2</sub>C<sub>2</sub>, Mo-O<sub>2</sub>N<sub>1</sub>C<sub>1</sub>, and Mo-O<sub>2</sub>N<sub>2</sub>, a bulk graphite model (hexagonal, *P63/mmc*) was first prepared. To get accurate lattice constants of the bulk graphite (Figure S17),<sup>5</sup> Brillouin-zone integrations were performed on a grid of (12 × 12 × 8) **k**-point meshes with the Monkhorst–Pack method.<sup>6</sup> (3 × 3 × 1) **k**-point meshes were used for 2D-slab model calculations. Our computational method using the DFT-D3 method in the RPBE level (RPBE/DFT-D3) reproduced the experimental value of the graphite interlayer spacing<sup>5</sup> at 4.2 K (3.336 Å versus 3.3111 Å, respectively). In addition, we compared the reference value of hydrogen adsorption energy and its Gibbs free energy on p(2 × 2) four-layered Pt(111)<sup>7</sup> in the RPBE level. As shown in Figure S17, the hexagonally networked graphite layers are combined by van der Waals forces with an interval of 3.3111 Å and a CC-bond length of 1.4273 Å. The calculated lattice parameters  $a = 2.4722$  Å and  $c = 6.6222$  Å are in line with the experimental values.<sup>5, 8</sup> As its (0001) facet is the basal plane and principally exposed,<sup>9</sup> we first applied the three-layer (0001) surface for generating Mo-containing SAC models. Figure S17 and Figure S18, respectively, show the structures of bulk graphite and a periodically extended 6 × 6 surface model (216 C atoms) with 15 Å of a vacuum space to separate the slabs. The bottom two layers were fixed to the bulk properties. Then, we generated four-coordinated Mo centers by following the experimental results. For the three-layer model, only the top-most layer and the adsorbate (*i.e.*, hydrogen atoms) were allowed to fully relax, whereas its bottom two layers were fixed at the bulk properties. A one-layer graphene model was examined to save computational time as shown in Figure S18. We confirmed that the difference of hydrogen adsorption energies between one- and three-layer models (~0.3 eV) may be negligible. Then, the one-layer model was used to propose plausible surface configurations supporting the experimental findings via extensive calculations. To verify the computational approach, as summarized in Table S3, a (2 × 2) surface of Pt(111) (16 Pt atoms) was applied. Only the most stable three-fold fcc active site was used for obtaining hydrogen adsorption energies. Without applying the dispersion correction, it agrees with that in the literature.<sup>7</sup> To accurately evaluate the HER activity of Mo-O<sub>2</sub>C<sub>2</sub>, Mo-O<sub>2</sub>N<sub>1</sub>C<sub>1</sub>, and Mo-O<sub>2</sub>N<sub>2</sub>, the Gibbs free

energy change of hydrogen adsorption ( $\Delta G_H$ ) is used as a crucial descriptor and defined as the following expression.<sup>7</sup>

$$\Delta G_H = \Delta E_H - T\Delta S_H + \Delta E_{ZPE} \quad (1)$$

where  $\Delta E_H$  is the adsorption energy of a hydrogen atom adsorbed at the Mo metal center of the SAC.

$$\Delta E_H = E(\text{H-SAC}) - E(\text{SAC}) - 1/2E(\text{H}_2) \quad (2)$$

where  $E(\text{H-SAC})$ ,  $E(\text{SAC})$ , and  $E(\text{H}_2)$  are the calculated energies of the SAC with an adsorbed hydrogen species, the clean SAC surface, and gas-phase  $\text{H}_2$ , respectively.  $\Delta S_H$  and  $\Delta E_{ZPE}$  are the entropy difference and zero-point energy (ZPE) of adsorbed hydrogen and gas-phase hydrogen, respectively.  $T$  is the temperature at 298.15 K. As the vibrational entropy term of an adsorbed hydrogen atom is negligible (Table S3), the entropy change is approximated by using  $\Delta S_H \cong -\frac{1}{2}S_{\text{H}_2}^0$  at the standard conditions. ZPEs

are calculated by  $E_{ZPE} = \sum_{i=1}^n \frac{1}{2}h\nu_i$ , where  $\nu_i$  is the vibrational frequency. The Dmol<sup>3</sup> module<sup>10-11</sup> implemented in the Materials Studio package<sup>12</sup> was used to obtain the correction energy of the Gibbs free energy ( $-T\Delta S_H + \Delta E_{ZPE}$ ) using the optimized geometries from VASP calculations. The double numerical polarization (DNP) 4.4 basis, the all-electron method, and the RPBE exchange-correlation functional were applied for the single-point energy calculations. As summarized in Table S3, the correction energy is close to the value reported in the literature and is a constant. The minor discrepancy results from different computational methods. Therefore, to be consistent with the literature,<sup>7</sup> we used the literature value of 0.24 eV, and the overall correction is taken as  $\Delta G_H = \Delta E_H + 0.24 \text{ eV}$ . The charge density difference was calculated according to the following expression

$$\Delta\rho = \rho_{\text{H-SAC}} - (\rho_{\text{SAC}} + \rho_{\text{H}})$$

where  $\rho_{\text{H-SAC}}$ ,  $\rho_{\text{SAC}}$ , and  $\rho_{\text{H}}$  are the charge density of Mo SAC with adsorbed H, SAC, and H, respectively. The charge density differences were rendered using VESTA.<sup>13</sup>

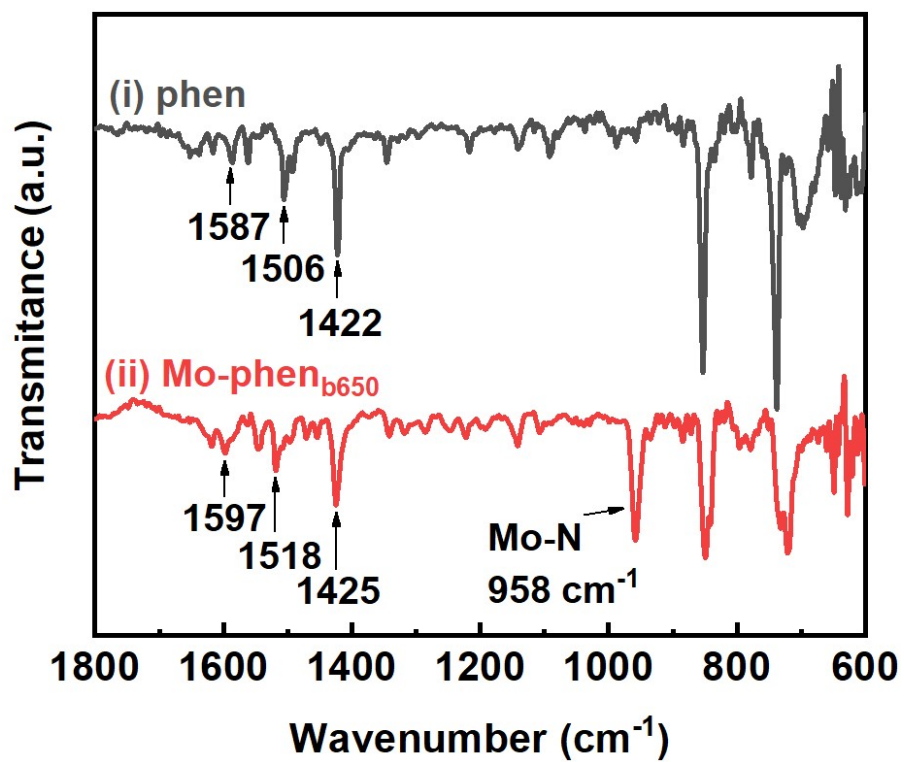

Figure S1. ATR-FTIR spectra of phen and Mo-phen<sub>b650</sub>.

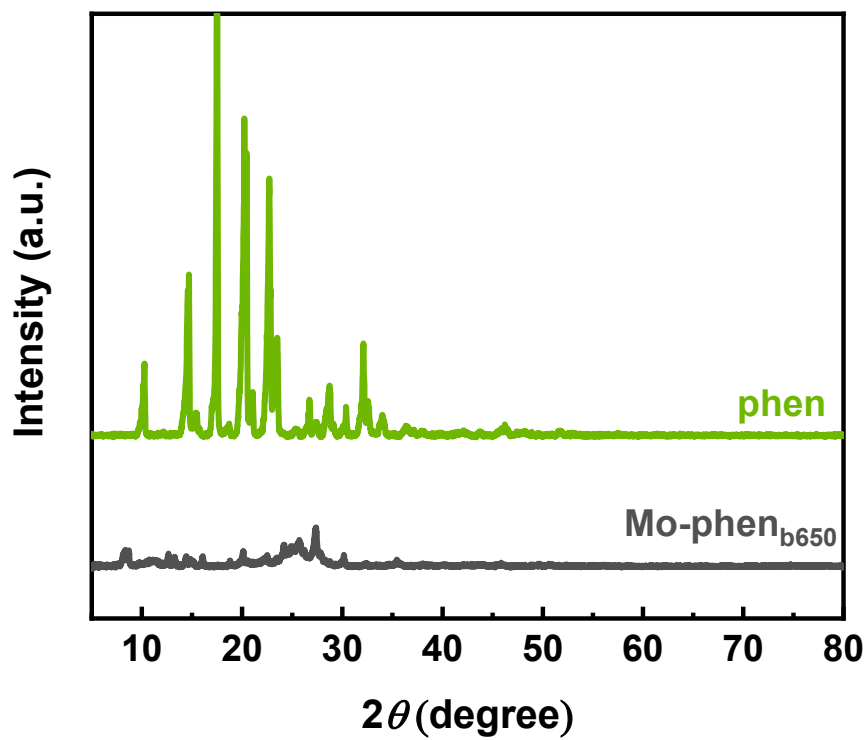

**Figure S2.** Powder XRD patterns of phen and Mo-phen<sub>b650</sub>.

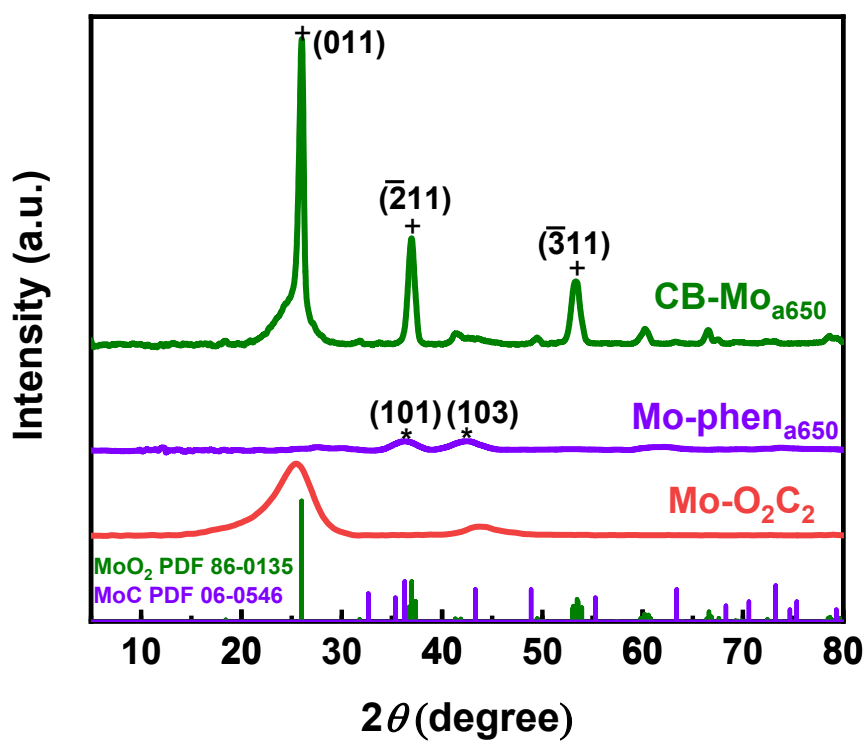

**Figure S3.** Powder XRD patterns of CB-Mo<sub>a650</sub>, Mo-phen<sub>a650</sub>, and Mo-O<sub>2</sub>C<sub>2</sub>.

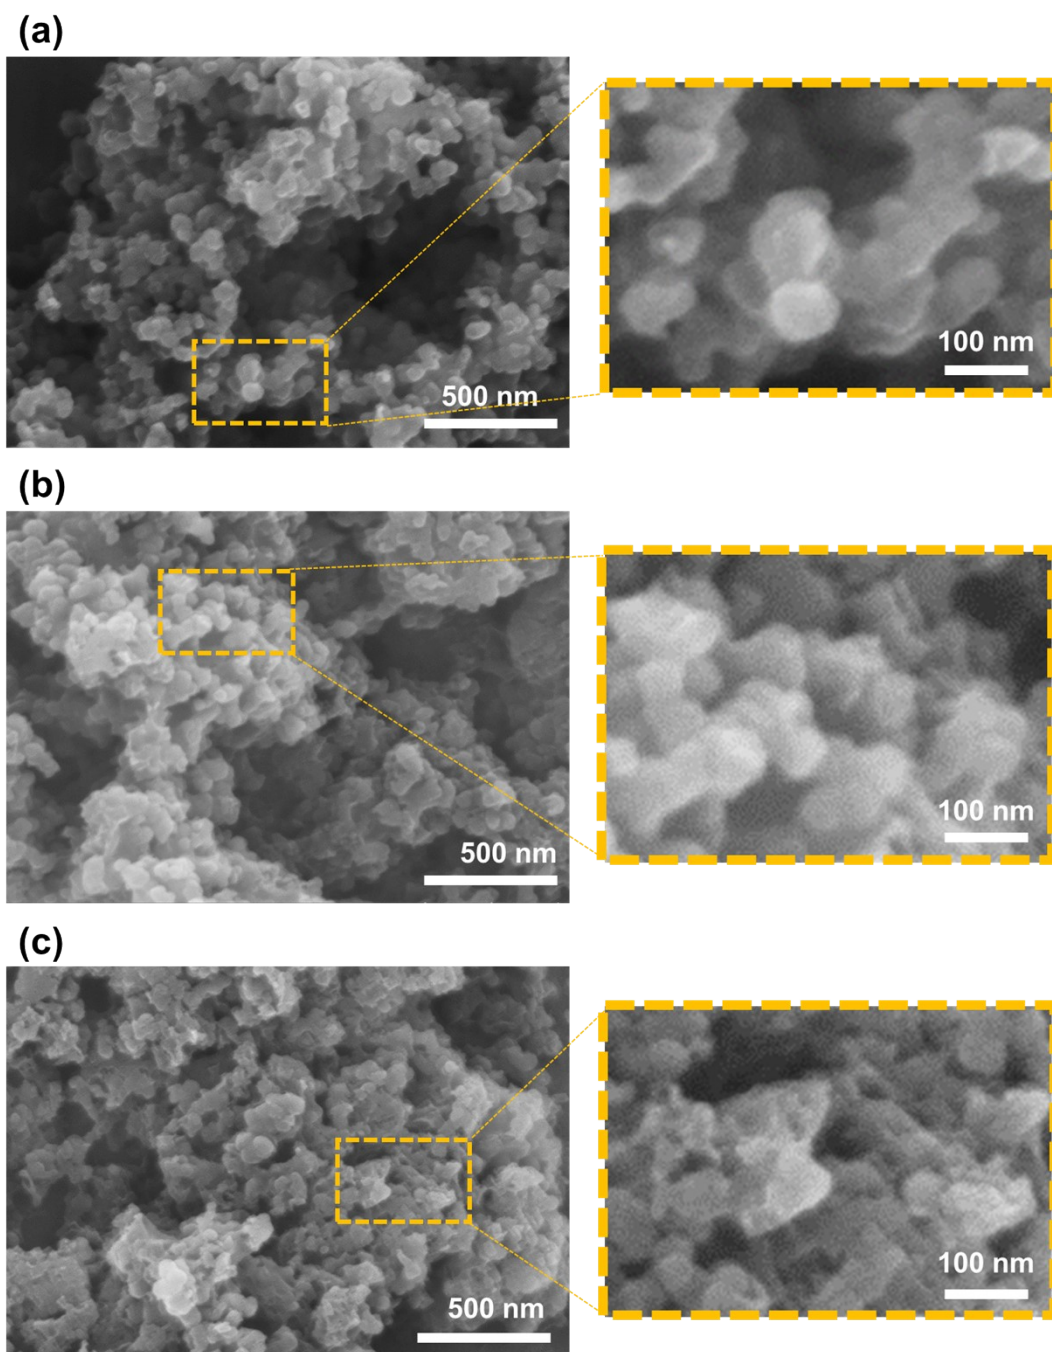

**Figure S4.** SEM images of (a)  $\text{Mo-O}_2\text{C}_2$ , (b)  $\text{Mo-O}_2\text{N}_1\text{C}_1$ , and (c)  $\text{Mo-O}_2\text{N}_2$ .

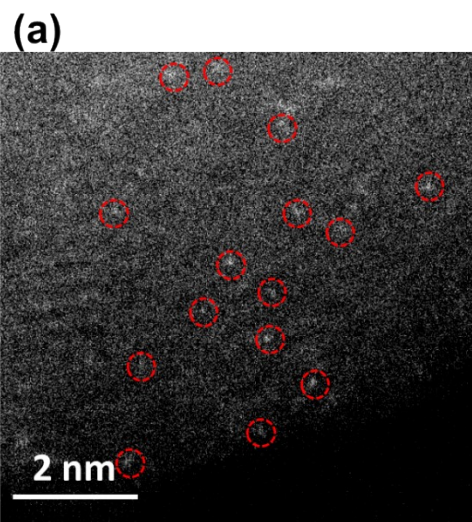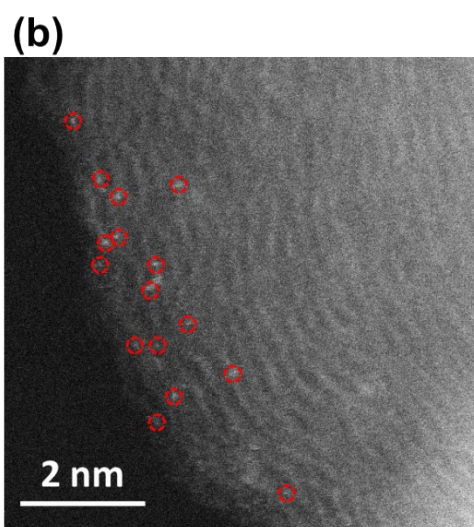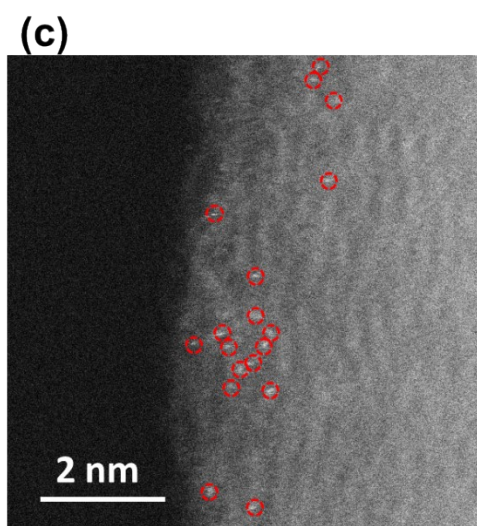

**Figure S5.** High magnification HAADF-STEM images of (a) Mo-O<sub>2</sub>C<sub>2</sub>, (b) Mo-O<sub>2</sub>N<sub>1</sub>C<sub>1</sub>, and (c) Mo-O<sub>2</sub>N<sub>2</sub>.



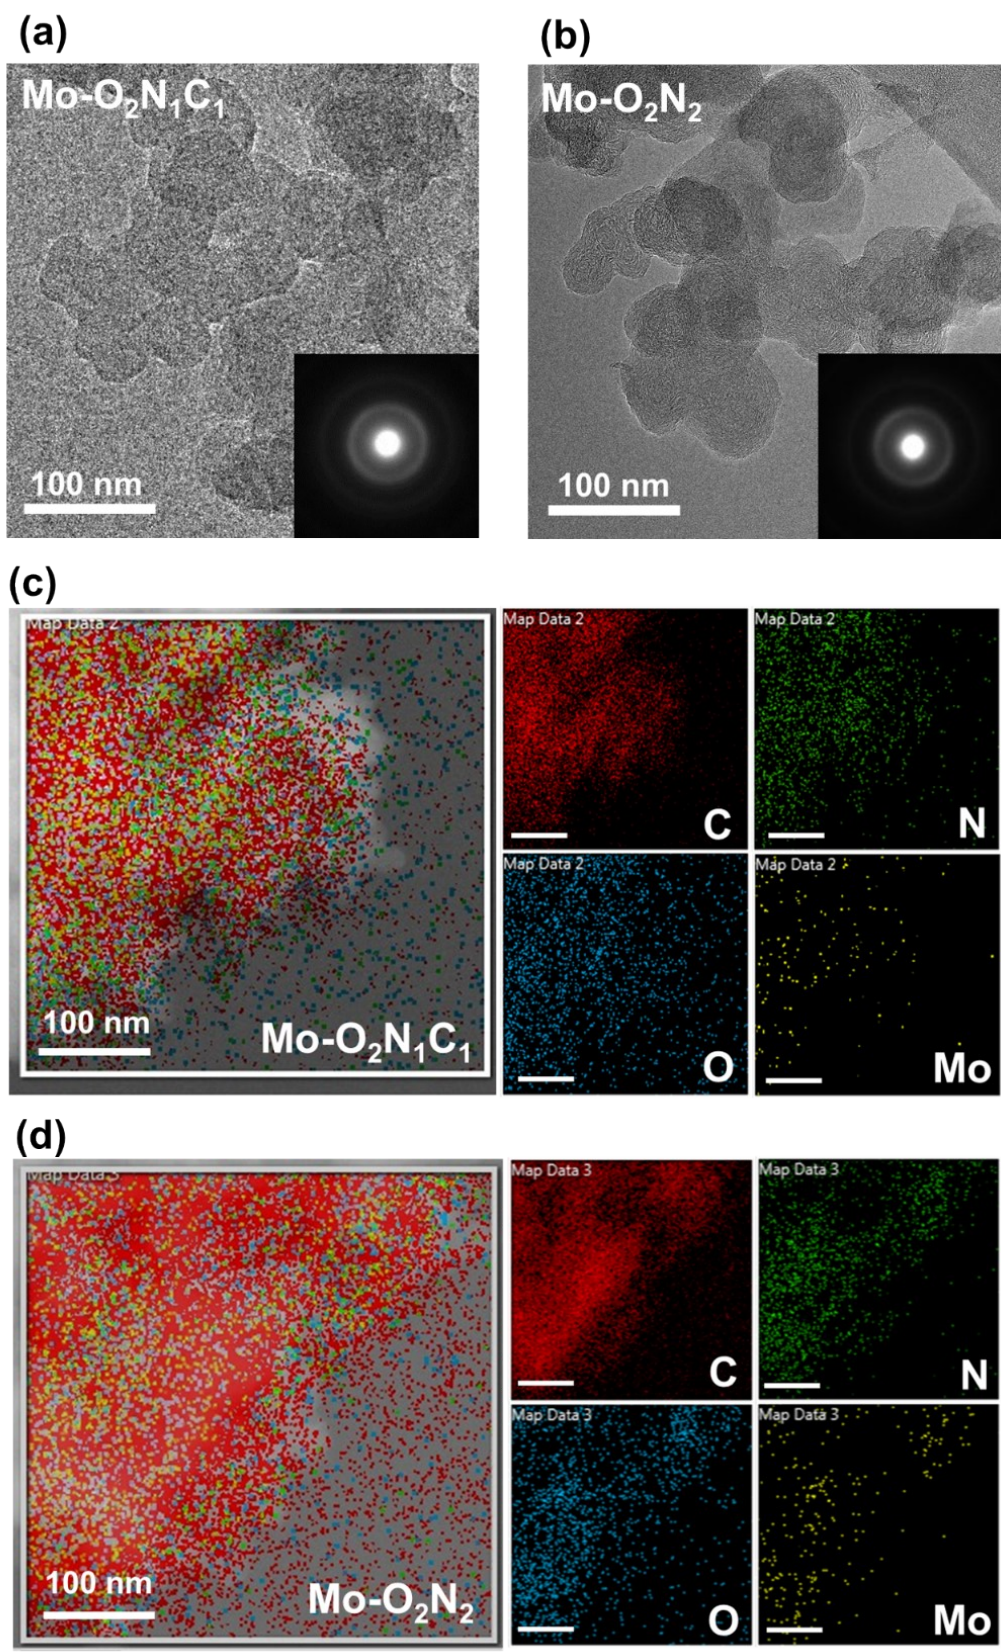

**Figure S6.** HR-TEM images and corresponding SAED patterns (inset) of (a) Mo-O<sub>2</sub>N<sub>1</sub>C<sub>1</sub> and (b) Mo-O<sub>2</sub>N<sub>2</sub>. EDS elemental mapping of (c) Mo-O<sub>2</sub>N<sub>1</sub>C<sub>1</sub> and (d) Mo-O<sub>2</sub>N<sub>2</sub> (scale bar: 100 nm).

**Table S1.** Optimal fitting results for EXAFS data of Mo-O<sub>2</sub>C<sub>2</sub>, Mo-O<sub>2</sub>N<sub>1</sub>C<sub>1</sub>, and Mo-O<sub>2</sub>N<sub>2</sub>.

| catalyst                                        | path | <i>C.N.</i> <sup>a</sup> | <i>R</i> (Å) <sup>b</sup> | $\Delta E_0$<br>(eV) <sup>c</sup> | $\sigma^2$ (Å <sup>2</sup> ) <sup>d</sup> | <i>R</i><br>factor <sup>e</sup> |
|-------------------------------------------------|------|--------------------------|---------------------------|-----------------------------------|-------------------------------------------|---------------------------------|
| Mo-O <sub>2</sub> C <sub>2</sub>                | Mo-O | 2.26±0.09                | 1.72                      | -7.24                             | 0.0020                                    | 0.004                           |
|                                                 | Mo-C | 2.08±0.29                | 1.98                      |                                   | 0.0071                                    |                                 |
| Mo-O <sub>2</sub> N <sub>1</sub> C <sub>1</sub> | Mo-O | 2.08±0.08                | 1.70                      | -6.70                             | 0.0020                                    | 0.002                           |
|                                                 | Mo-C | 0.82±0.13                | 2.02                      |                                   | 0.0090                                    |                                 |
|                                                 | Mo-N | 0.79±0.20                | 2.18                      |                                   | 0.0030                                    |                                 |
| Mo-O <sub>2</sub> N <sub>2</sub>                | Mo-O | 2.06±0.07                | 1.74                      | -8.50                             | 0.0021                                    | 0.002                           |
|                                                 | Mo-N | 1.79±0.24                | 2.14                      |                                   | 0.0080                                    |                                 |

<sup>a</sup>*C.N.*, coordination number; <sup>b</sup>*R*, distance between absorber and backscatter atoms; <sup>c</sup> $\Delta E_0$ , inner potential correction; <sup>d</sup> $\sigma^2$ , Debye-Waller factor, thermal and structural disorders; <sup>e</sup>*R* factor, an indicator of fitting accuracy.  $S_0^2$  was set to 0.95. Fitting ranges were all set to  $1.0 < R < 2.0$  Å.

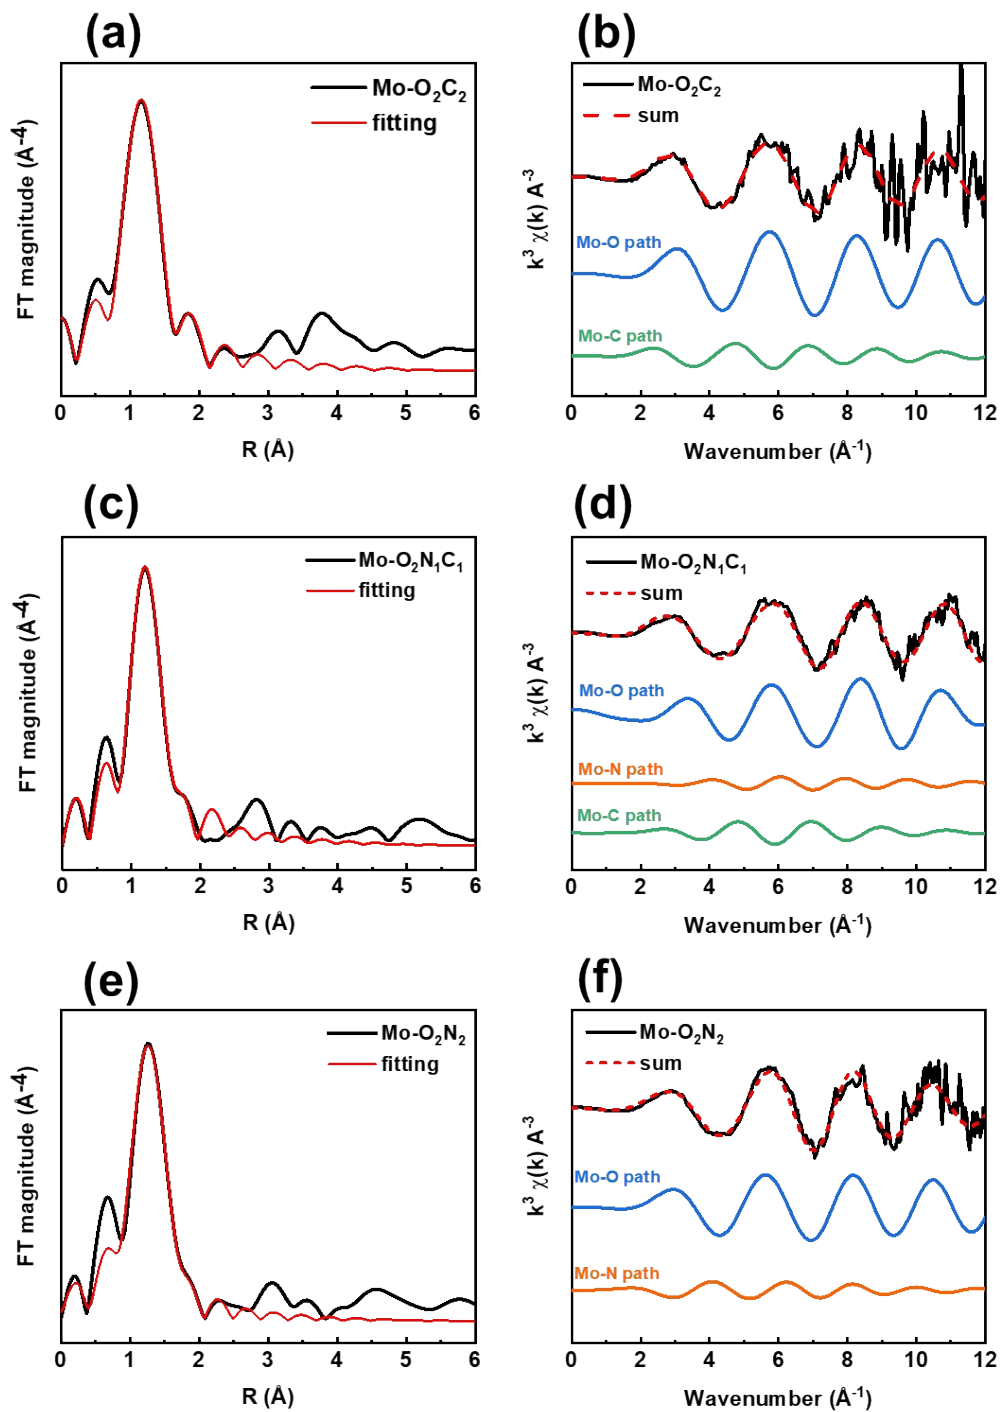

**Figure S7.** First-shell fitting of  $k^3$ -weighted EXAFS in  $R$  space and inverted FT-EXAFS fitting paths in  $k$  space. (a) and (b) Mo-O<sub>2</sub>C<sub>2</sub>, (c) and (d) Mo-O<sub>2</sub>N<sub>1</sub>C<sub>1</sub>, (e) and (f) Mo-O<sub>2</sub>N<sub>2</sub>. Fitting ranges were all set to  $1.0 < R < 2.0$  Å.

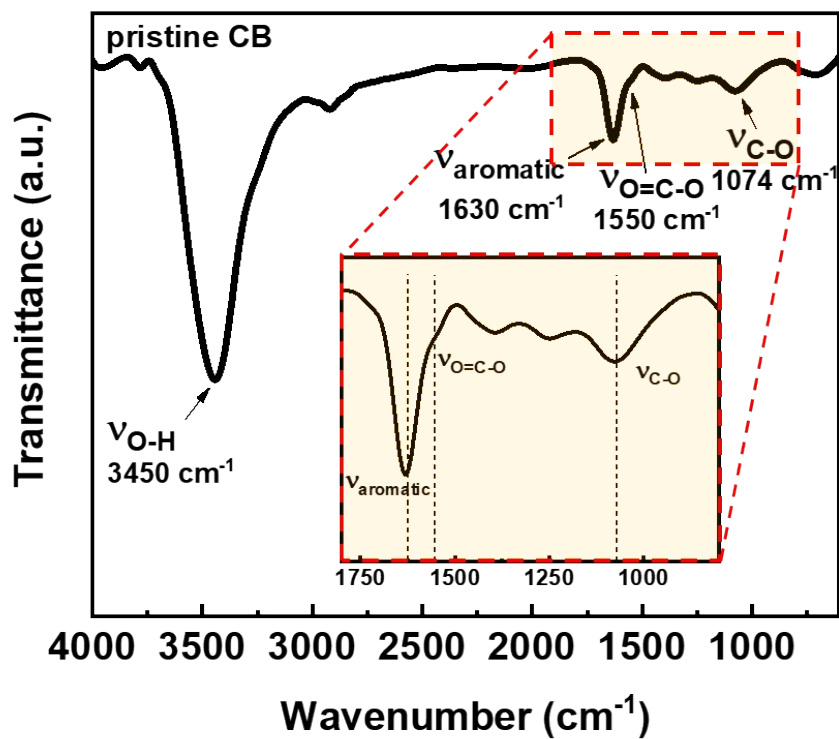

Figure S8. FTIR spectrum of CB.

**Table S2.** Summary of precursors and N/C molar ratios for fabrication of Mo SACs.

| sample                                          | precursor                                      | N/C molar ratio in precursor             |
|-------------------------------------------------|------------------------------------------------|------------------------------------------|
| Mo-O <sub>2</sub> C <sub>2</sub>                | CB (150 mg),<br>phen (216 mg)                  | 0.08 (100% from phen,<br>0% from DCD)    |
| Mo-O <sub>2</sub> N <sub>1</sub> C <sub>1</sub> | CB (150 mg),<br>phen (216 mg),<br>DCD (100 mg) | 0.25<br>(32% from phen, 68%<br>from DCD) |
| Mo-O <sub>2</sub> N <sub>2</sub>                | CB (150 mg),<br>phen (216 mg),<br>DCD (200 mg) | 0.39 (18% from phen,<br>82% from DCD)    |

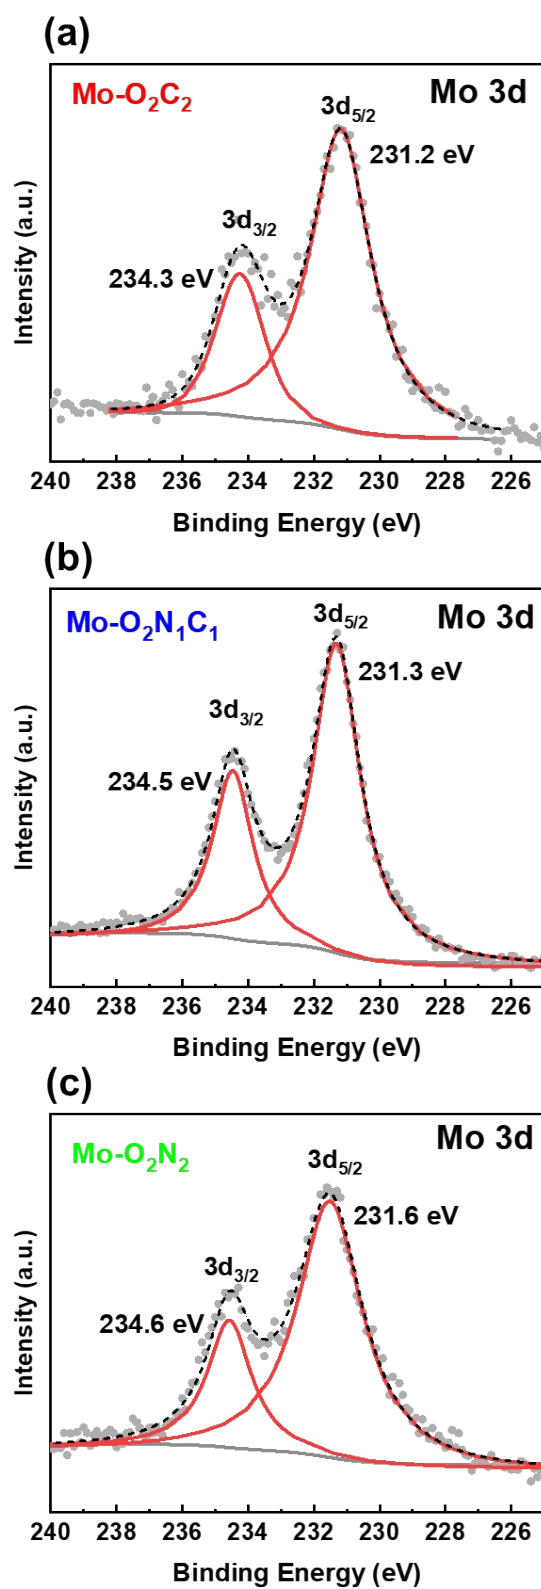

**Figure S9.** HR-XPS spectra of (a) Mo-O<sub>2</sub>C<sub>2</sub>, (b) Mo-O<sub>2</sub>N<sub>1</sub>C<sub>1</sub>, and (c) Mo-O<sub>2</sub>N<sub>2</sub> with fitted Mo 3d<sub>5/2</sub> and Mo 3d<sub>3/2</sub> curves plotted in red, and accumulation of fitted peaks plotted in black dashes.

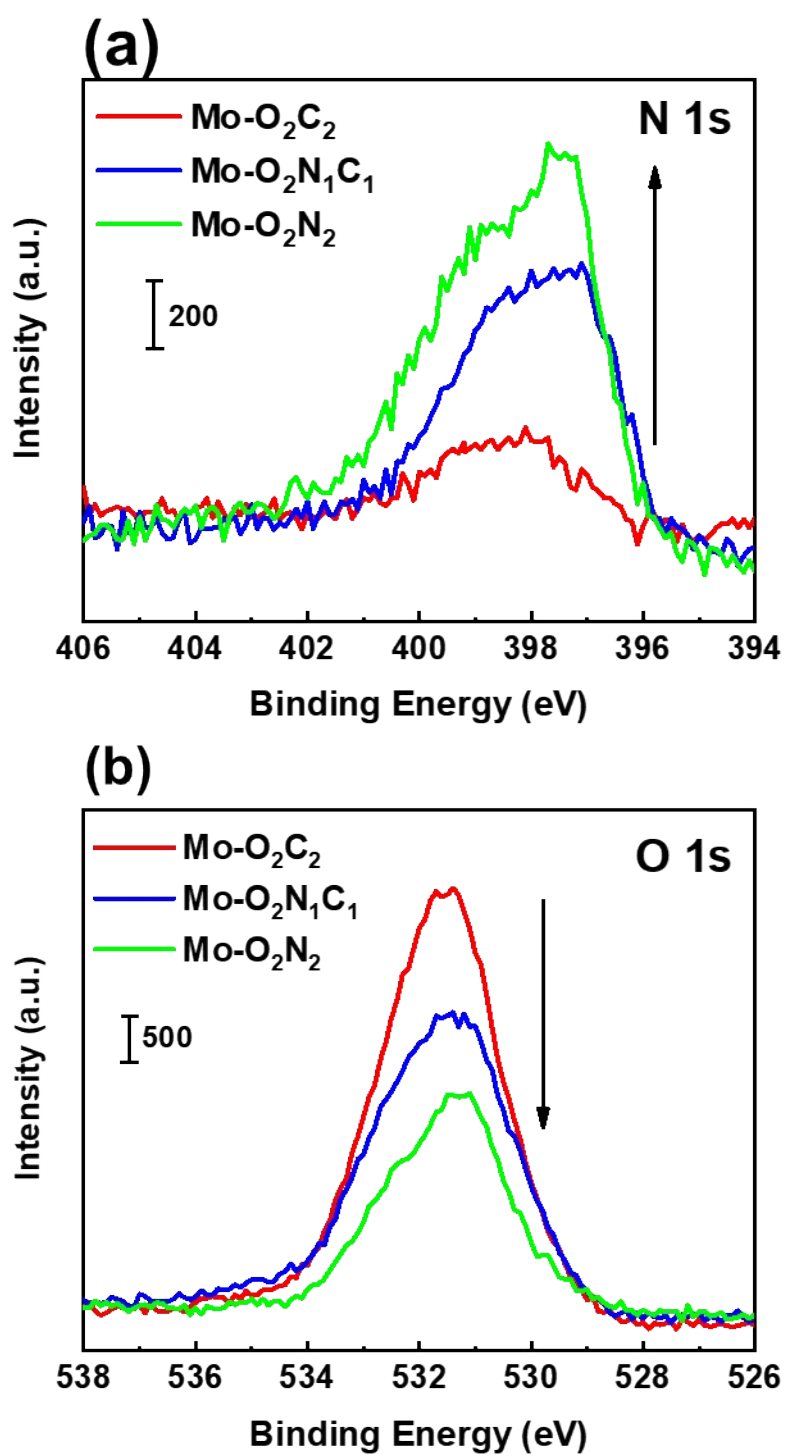

**Figure S10.** Overlaid HR-XPS spectra of Mo-O<sub>2</sub>C<sub>2</sub>, Mo-O<sub>2</sub>N<sub>1</sub>C<sub>1</sub>, and Mo-O<sub>2</sub>N<sub>2</sub>. (a) N 1s and (b) O 1s.



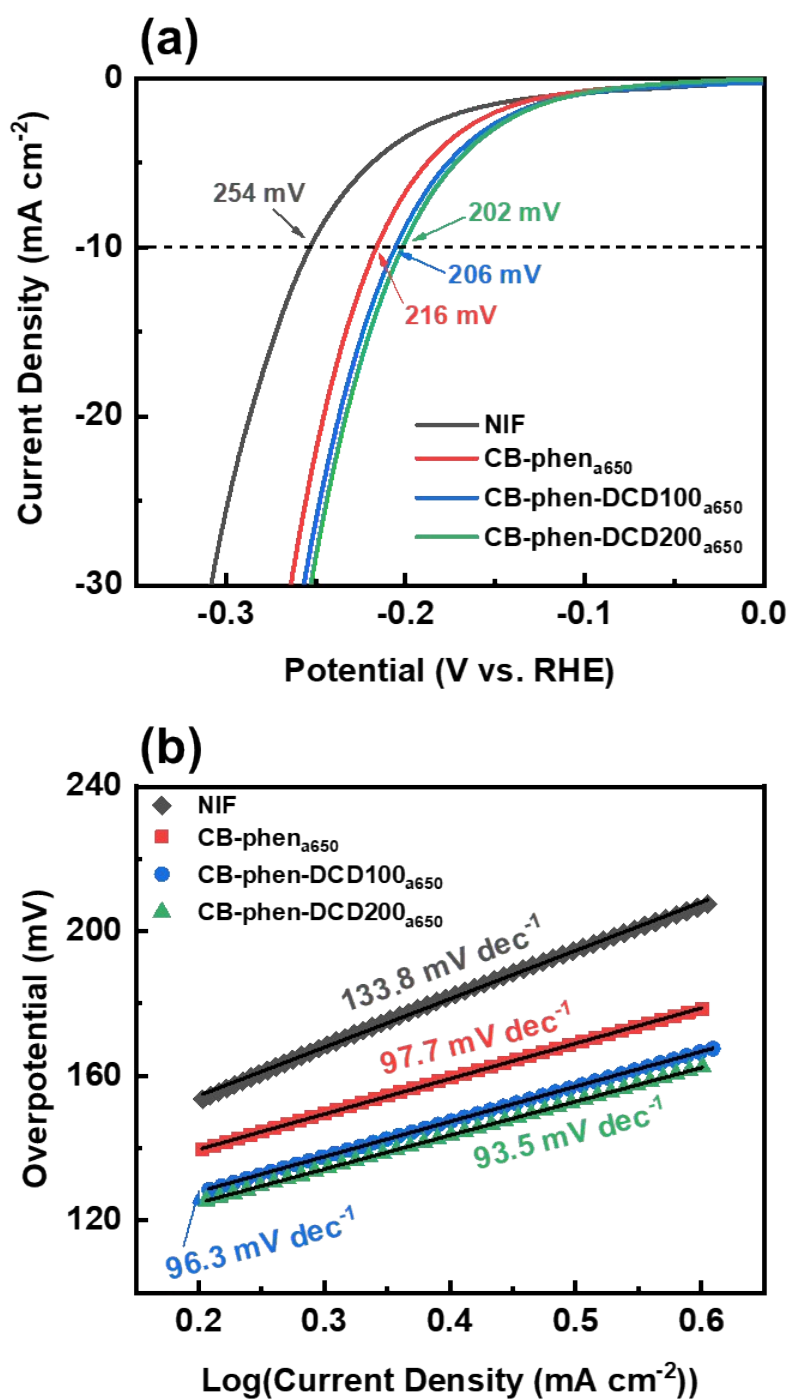

**Figure S11.** (a) LSV curves and (b) Tafel plots of NIF, CB-phen<sub>a650</sub>, CB-phen-DCD100<sub>a650</sub>, and CB-phen-DCD200<sub>a650</sub> in 1.0 M KOH. CB-phen<sub>a650</sub>, CB-phen-DCD100<sub>a650</sub>, and CB-phen-DCD200<sub>a650</sub> are control samples, prepared without presence of Mo precursor, corresponding to Mo-O<sub>2</sub>C<sub>2</sub>, Mo-O<sub>2</sub>N<sub>1</sub>C<sub>1</sub>, and Mo-O<sub>2</sub>N<sub>2</sub>, respectively.



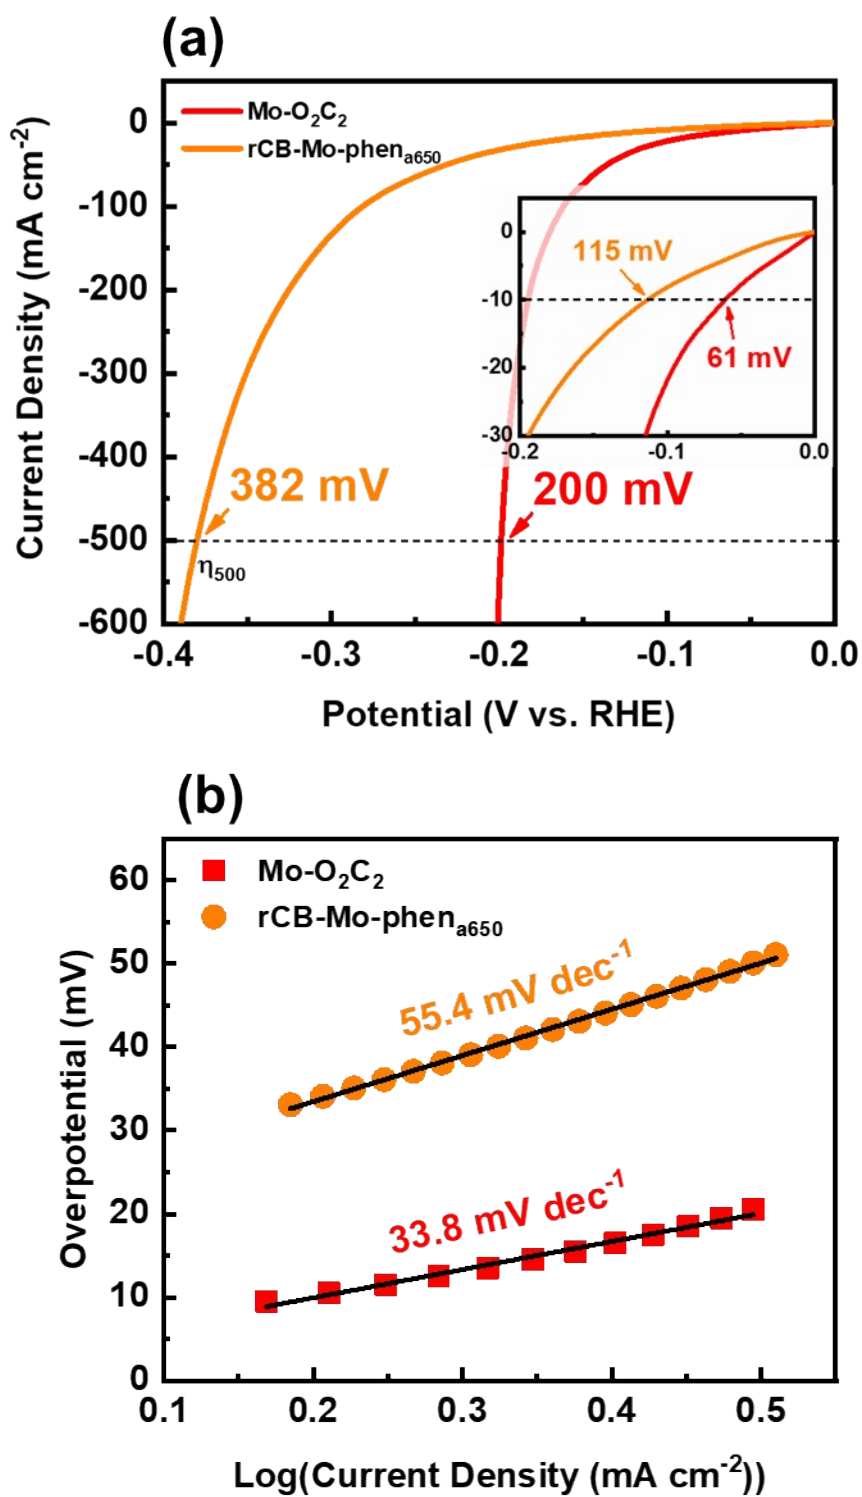

**Figure S12.** (a) LSV curves and (b) Tafel curves of Mo- $\text{O}_2\text{C}_2$  and rCB-Mo-phen<sub>a650</sub> in 1.0 M KOH.

**Table S3.** Summary of  $R_{ct}$  of sample electrodes determined at -0.17 V (vs. RHE) in 1.0 M KOH.

| catalyst                                        | $R_{ct}$ ( $\Omega$ ) |
|-------------------------------------------------|-----------------------|
| Pt/C                                            | 0.70                  |
| Mo-O <sub>2</sub> C <sub>2</sub>                | 1.32                  |
| Mo-O <sub>2</sub> N <sub>1</sub> C <sub>1</sub> | 2.07                  |
| Mo-O <sub>2</sub> N <sub>2</sub>                | 2.72                  |

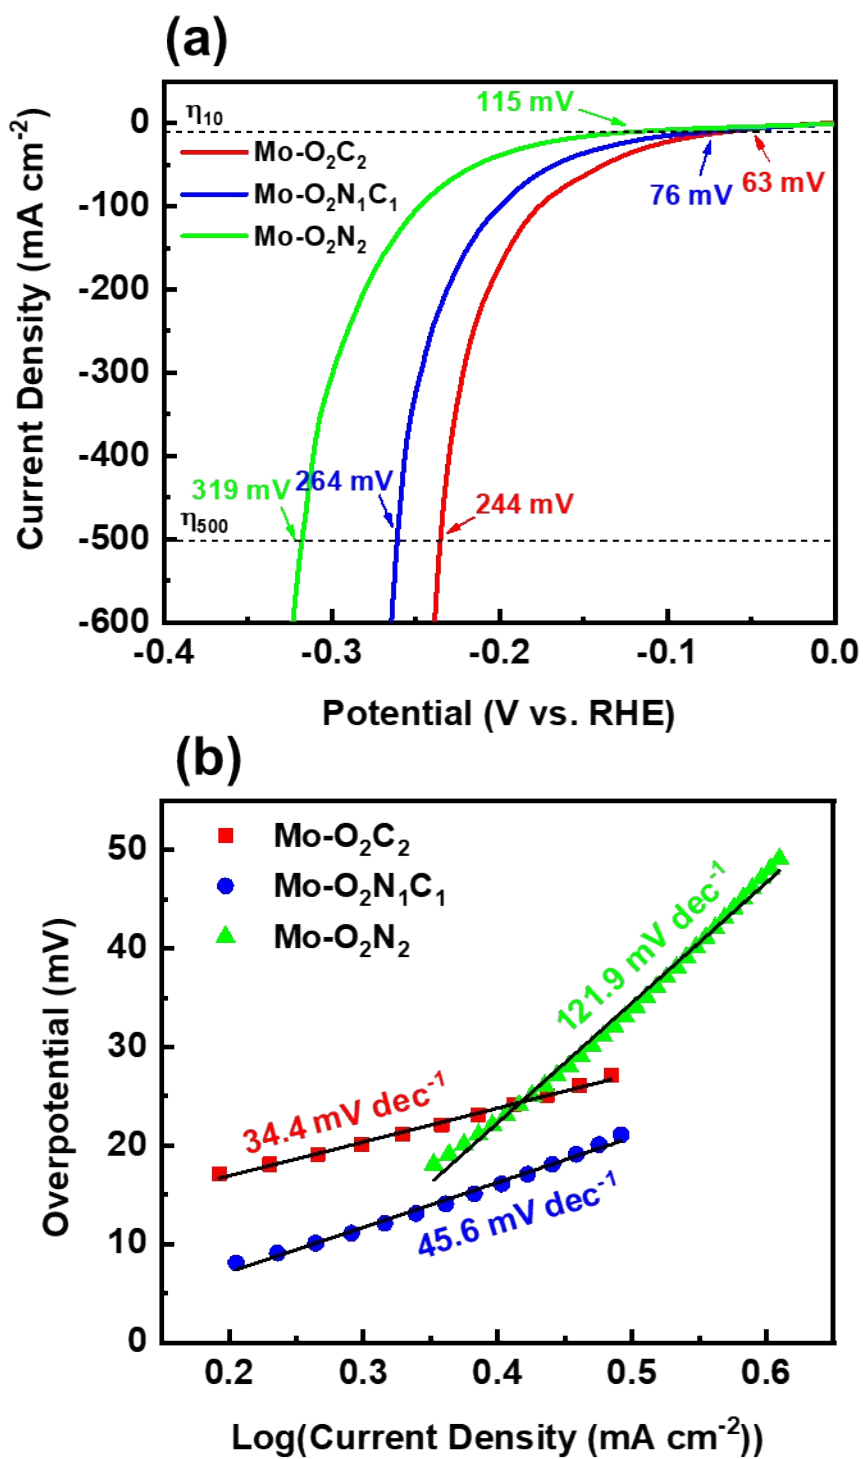

**Figure S13.** Electrochemical characterizations of Mo-O<sub>2</sub>C<sub>2</sub>, Mo-O<sub>2</sub>N<sub>1</sub>C<sub>1</sub>, and Mo-O<sub>2</sub>N<sub>2</sub> in 0.5 M H<sub>2</sub>SO<sub>4</sub>. (a) LSV curves and (b) Tafel plots.

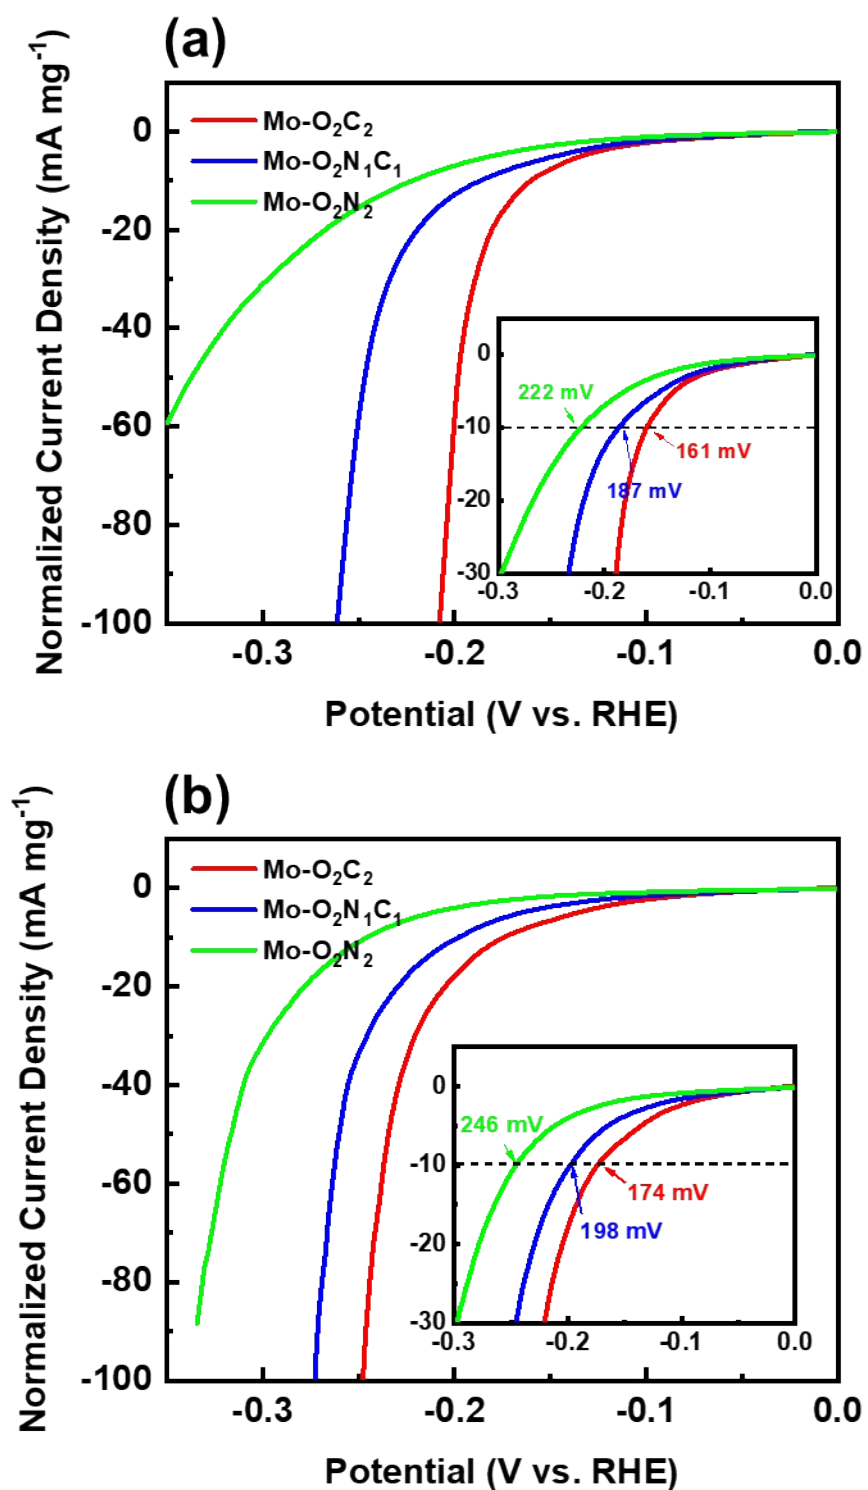

**Figure S14.** Mass loading normalized LSV curves of Mo-O<sub>2</sub>C<sub>2</sub>, Mo-O<sub>2</sub>N<sub>1</sub>C<sub>1</sub>, and Mo-O<sub>2</sub>N<sub>2</sub> in (a) 1.0 M KOH and (b) 0.5 M H<sub>2</sub>SO<sub>4</sub>. Inset shows LSV curves in low current density region.

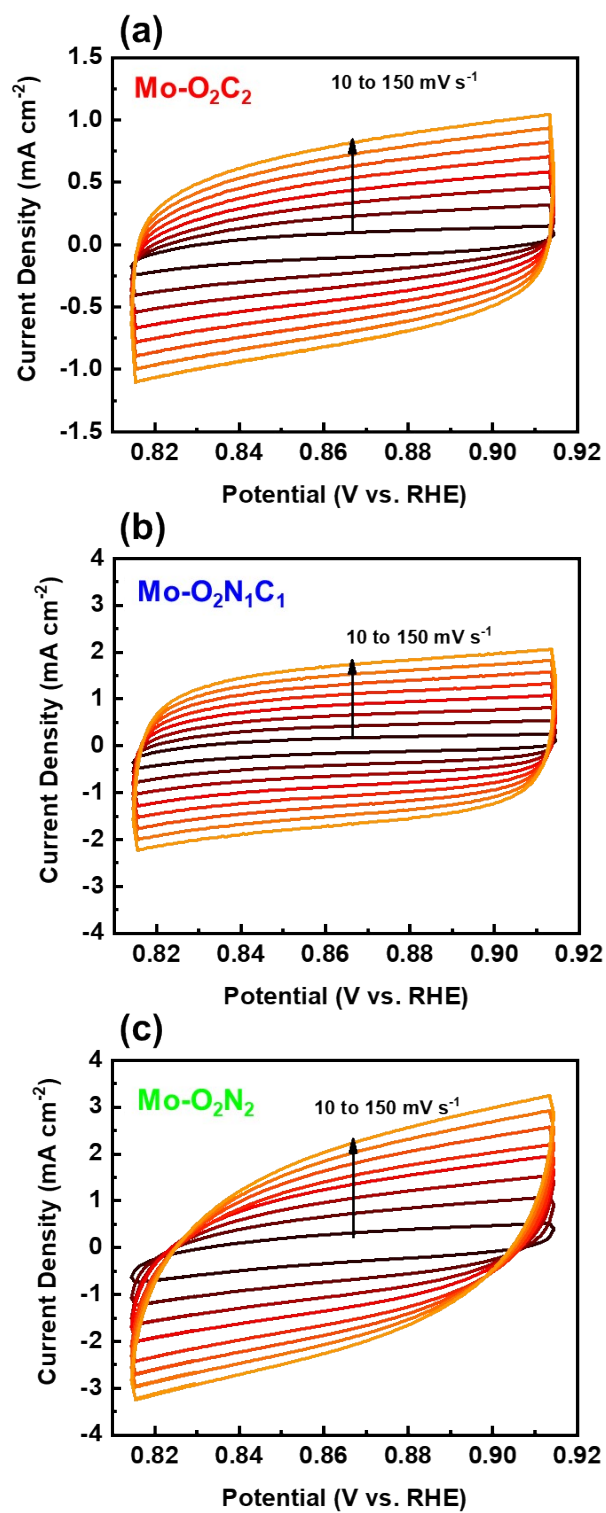

**Figure S15.** CVs of (a) Mo-O<sub>2</sub>C<sub>2</sub>, (b) Mo-O<sub>2</sub>N<sub>1</sub>C<sub>1</sub>, and (c) Mo-O<sub>2</sub>N<sub>2</sub> recorded at increasing scan rates from 10 to 150  $\text{mV s}^{-1}$  for estimating of  $C_{dl}$  in 1.0 M KOH.

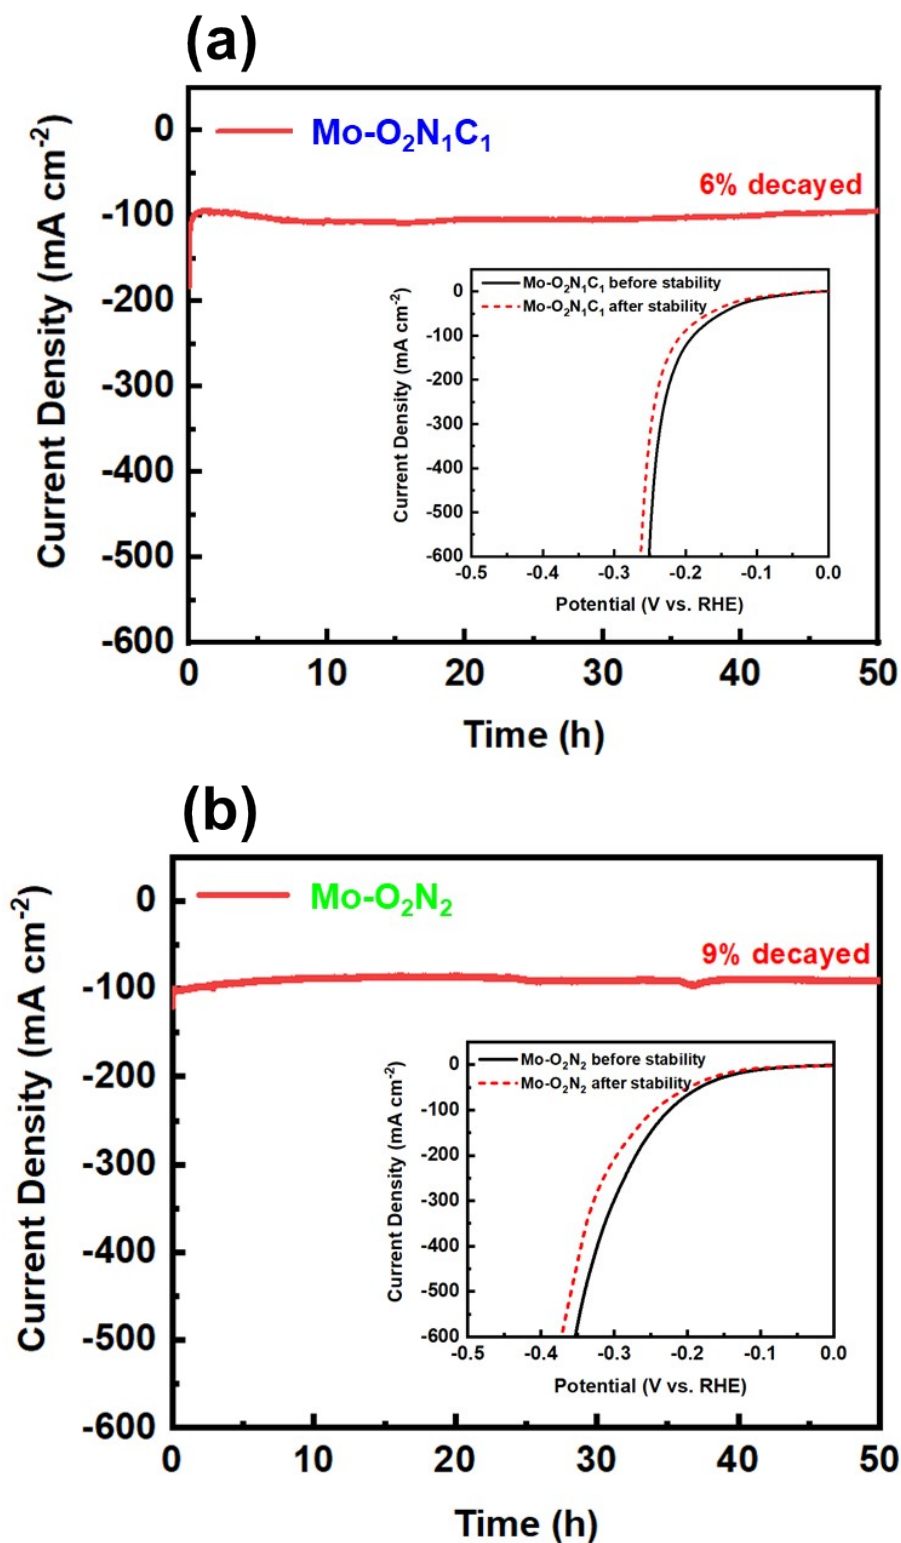

**Figure S16.** Stability test of (a) Mo-O<sub>2</sub>N<sub>1</sub>C<sub>1</sub> and (b) Mo-O<sub>2</sub>N<sub>2</sub> at initial current density of 100 mA cm<sup>-2</sup> in 1.0 M KOH for 50 h. Inset shows LSV curves before and after stability test.

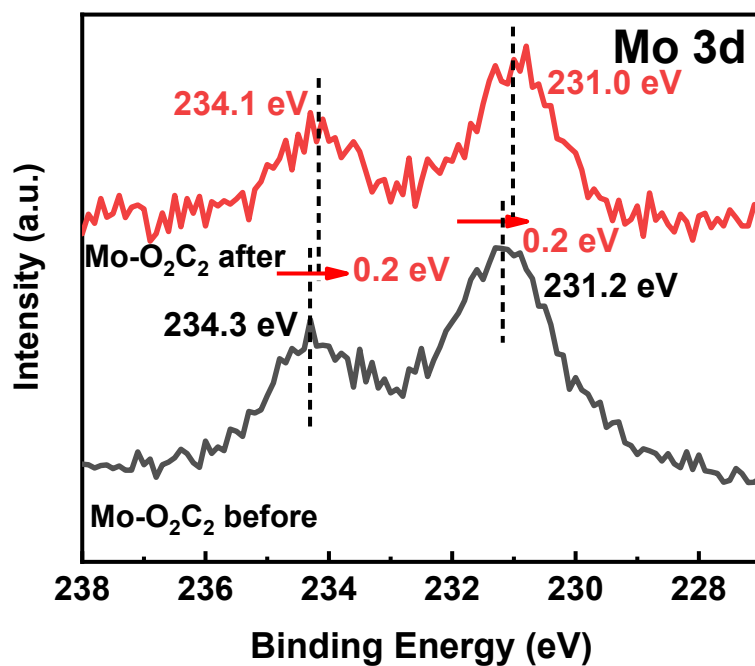

**Figure S17.** Mo 3d HR-XPS spectra of Mo-O<sub>2</sub>C<sub>2</sub> before and after stability test in 1.0 M KOH.

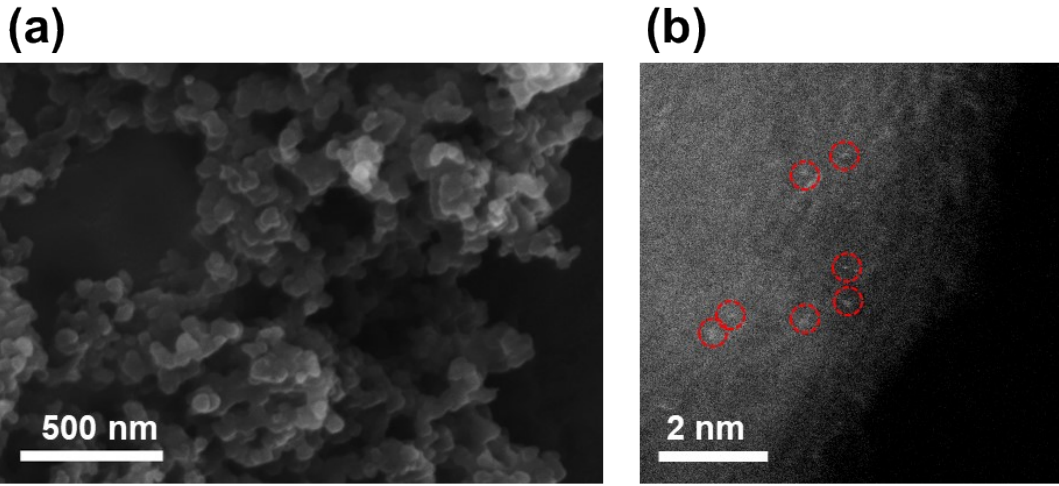

**Figure S18.** (a) SEM image and (b) high magnification HAADF-STEM image of Mo-O<sub>2</sub>C<sub>2</sub> after stability test in 1.0 M KOH. Isolated Mo atoms were marked with red dashed circles.



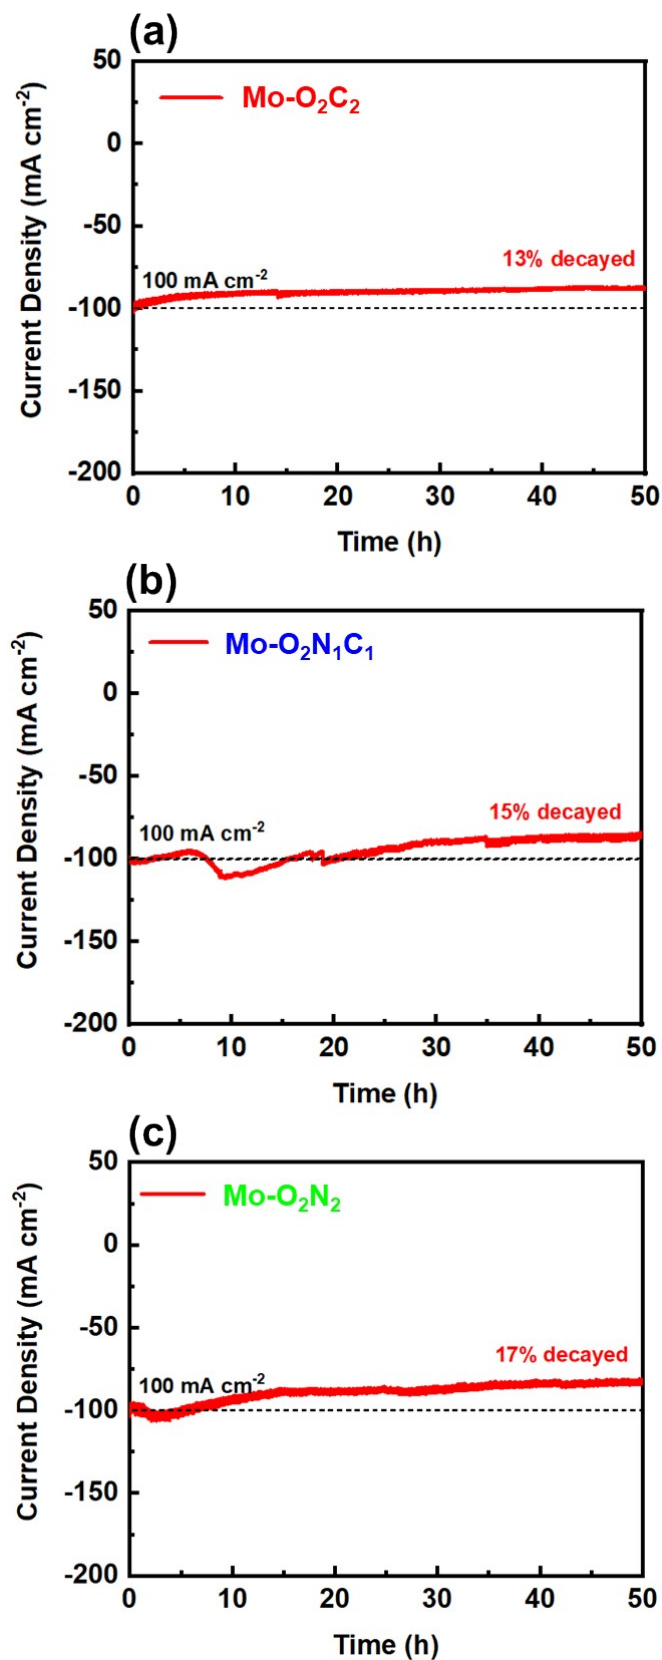

**Figure S19.** Stability test of (a) Mo-O<sub>2</sub>C<sub>2</sub>, (b) Mo-O<sub>2</sub>N<sub>1</sub>C<sub>1</sub> and (c) Mo-O<sub>2</sub>N<sub>2</sub> at the initial current density of -100 mA cm<sup>-2</sup> in 0.5 M H<sub>2</sub>SO<sub>4</sub> for 50 h.

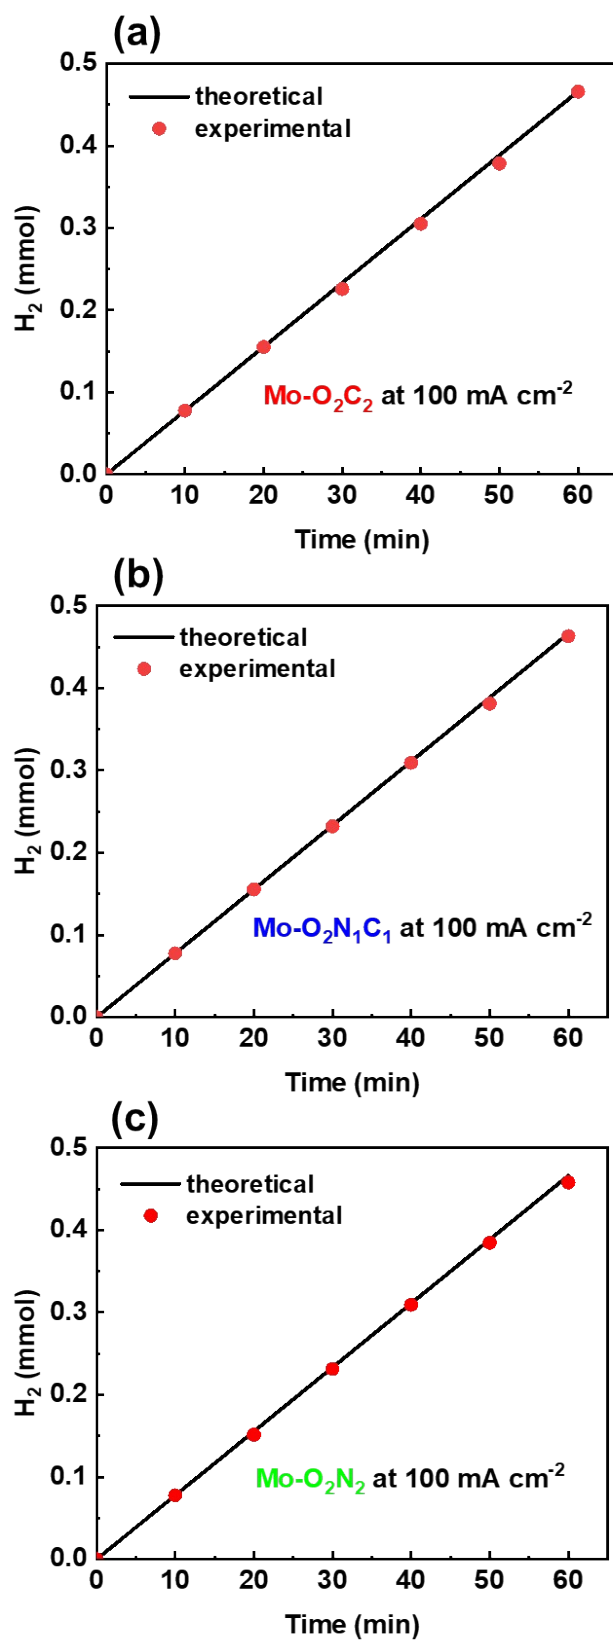

**Figure S20.** Faradaic efficiency of (a)  $Mo-O_2C_2$ , (b)  $Mo-O_2N_1C_1$ , and (c)  $Mo-O_2N_2$  determined at  $100 \text{ mA cm}^{-2}$  for 60 minutes in 1.0 M KOH.

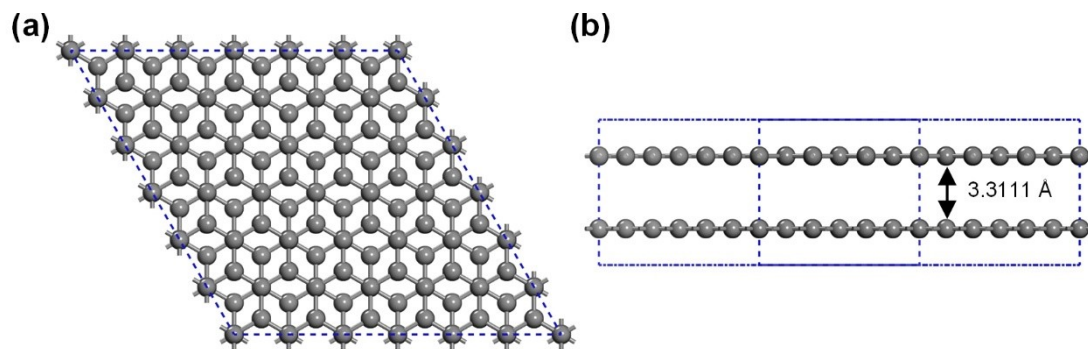

**Figure S21.** (a) Top and (b) side views of bulk graphite (hexagonal,  $P63/mmc$ ) optimized at RPBE-DFT/D3, resulting in graphite interlayer spacing of 3.3111 Å and CC-bond length of 1.4273 Å. Calculated lattice parameters are  $a = 2.4722$  Å and  $c = 6.6222$  Å.

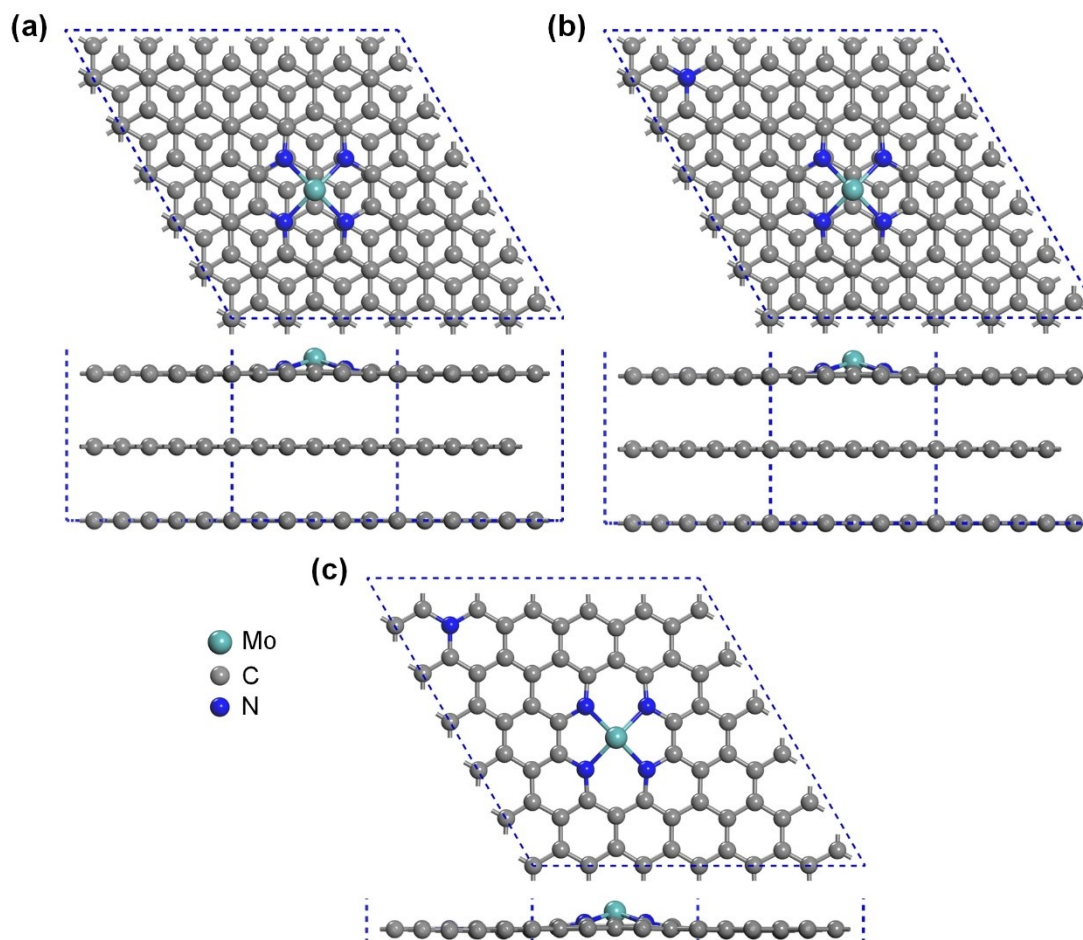

**Figure S22.** Top and side views of three-layered SA Mo-centered surface models: (a) without and (b) with graphitic N, and (c) one-layer graphene model.

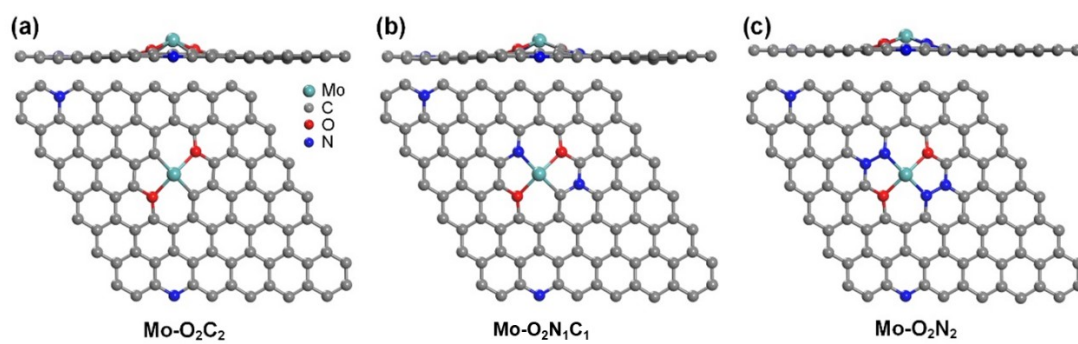

**Figure S23.** Top and side views of three SA models of (a) Mo-O<sub>2</sub>C<sub>2</sub>, (b) Mo-O<sub>2</sub>N<sub>1</sub>C<sub>1</sub>, and (c) Mo-O<sub>2</sub>N<sub>2</sub>.

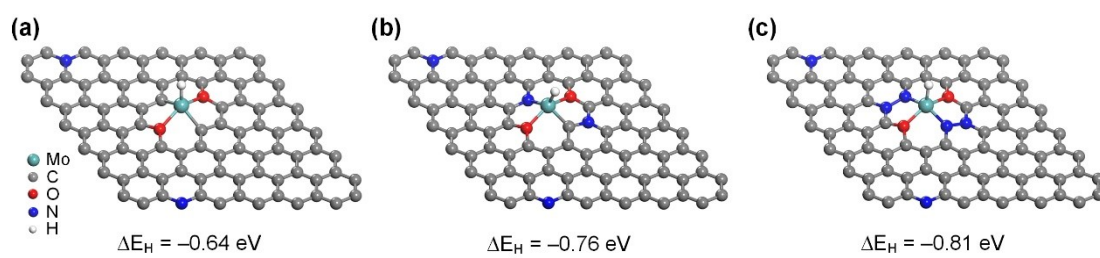

**Figure S24.** Side views of hydrogen adsorption ( $\Delta E_H$ ) on three SA models of (a) Mo-O<sub>2</sub>C<sub>2</sub>, (b) Mo-O<sub>2</sub>N<sub>1</sub>C<sub>1</sub>, and (c) Mo-O<sub>2</sub>N<sub>2</sub>.

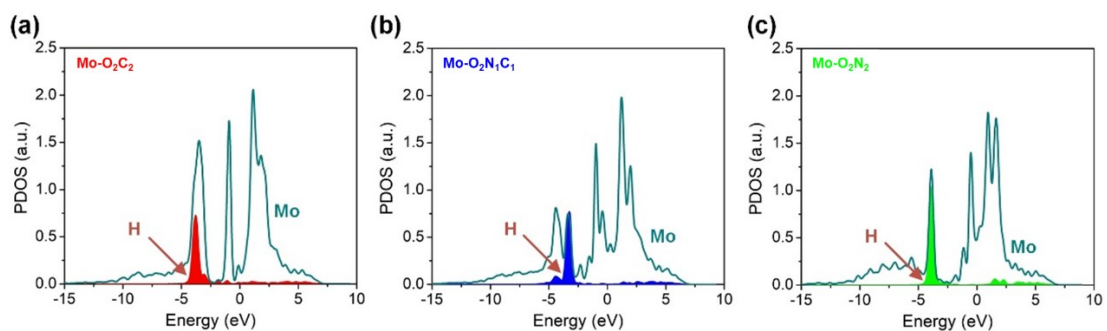

**Figure S25.** Projected density of states (PDOSs) of orbitals of Mo d and H 1s of hydrogen adsorption on three SA models of (a) Mo-O<sub>2</sub>C<sub>2</sub>, (b) Mo-O<sub>2</sub>N<sub>1</sub>C<sub>1</sub>, and (c) Mo-O<sub>2</sub>N<sub>2</sub>. Fermi energy level ( $E_F$ ) is set to zero.

**Table S4.** (a) Compilation of electronic and thermodynamic properties for H<sub>2</sub>. (b) Calculated hydrogen adsorption properties on different surfaces.

| (a)            | ZPE (eV) | S (kcal/mol K) | S (eV) at 298.15 K | Remark                 |
|----------------|----------|----------------|--------------------|------------------------|
| H <sub>2</sub> | 0.27     | 0.032542       | 0.42               | RPBE & RPBE/DFT-D3(BJ) |

| (b)                                             | ZPE (eV) | $\Delta E_H$ (eV) | Correction energy (eV) | $\Delta G_H$ (eV) <sup>[1]</sup> | Remark          |
|-------------------------------------------------|----------|-------------------|------------------------|----------------------------------|-----------------|
| Pt(111)                                         | 0.175    | -0.32             | 0.25                   | -0.07 (-0.08)                    | RPBE            |
| Mo-O <sub>2</sub> C <sub>2</sub>                | 0.104    | -0.64             | 0.18                   | -0.46 (-0.40)                    | RPBE/DFT-D3(BJ) |
| Mo-O <sub>2</sub> N <sub>1</sub> C <sub>1</sub> | 0.107    | -0.76             | 0.18                   | -0.58 (-0.52)                    | RPBE/DFT-D3(BJ) |
| Mo-O <sub>2</sub> N <sub>2</sub>                | 0.108    | -0.81             | 0.18                   | -0.63 (-0.57)                    | RPBE/DFT-D3(BJ) |

[1] Values in parentheses are calculated according to  $\Delta G_H = \Delta G_H + 0.24$  and were used to prepare Gibbs energy diagram in the main text.<sup>6</sup>



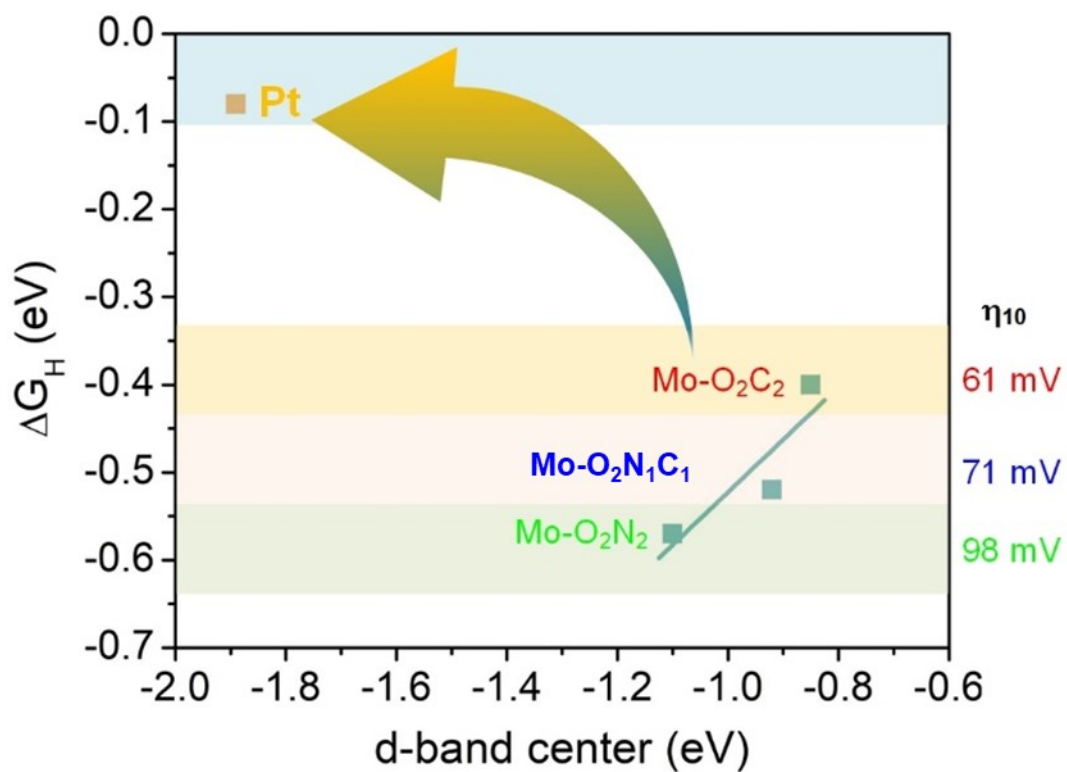

**Figure S26.** Illustration of calculated Gibbs free energies and overpotentials measured at 10 mA/cm<sup>2</sup> for Mo-O<sub>2</sub>C<sub>2</sub>, Mo-O<sub>2</sub>N<sub>1</sub>C<sub>1</sub>, and Mo-O<sub>2</sub>N<sub>2</sub> against d-band center of their Mo metal centers.

**Table S5.** Comparison of HER efficiency and stability of recently reported state-of-the-art SACs.

| Catalyst                                                    | SA Concentration | Electrolyte                          | Over-potential (mV)                    | Tafel slope (mV dec <sup>-1</sup> ) | Stability                                                    |
|-------------------------------------------------------------|------------------|--------------------------------------|----------------------------------------|-------------------------------------|--------------------------------------------------------------|
| Mo-O <sub>2</sub> C <sub>2</sub> (this work)                | Mo (3.14 wt%)    | 1.0 M KOH                            | 61( $\eta_{10}$ ), 200( $\eta_{500}$ ) | 33.8                                | i-t at -100 mA cm <sup>-2</sup> for 50 h, 6% decayed         |
|                                                             |                  | 0.5 M H <sub>2</sub> SO <sub>4</sub> | 63( $\eta_{10}$ ), 244( $\eta_{500}$ ) | 34.4                                | i-t at -100 mA cm <sup>-2</sup> for 50 h, 12% decayed        |
| Mo <sub>1</sub> N <sub>1</sub> C <sub>2</sub> <sup>14</sup> | 1.32 wt%         | 0.1 M KOH                            | 132( $\eta_{10}$ )                     | 90                                  | negligible decayed after 1000 CV cycles                      |
| Mo-SA@NCA <sup>15</sup>                                     | Mo (18.16 wt%)   | 1.0 M KOH                            | ~270                                   | N/A                                 | N/A                                                          |
|                                                             |                  | 0.5 M H <sub>2</sub> SO <sub>4</sub> | ~220                                   | N/A                                 |                                                              |
| Ni/GD <sup>16</sup>                                         | Ni (0.278 wt%)   | 0.5 M H <sub>2</sub> SO              | 88( $\eta_{10}$ )                      | 45.8                                | i-t at -10 mA cm <sup>-2</sup> for 116 h, negligible decayed |
| Fe/GD <sup>16</sup>                                         | Fe (0.680 wt%)   | 0.5 M H <sub>2</sub> SO <sub>4</sub> | 66( $\eta_{10}$ )                      | 37.8                                | i-t at -30 mA cm <sup>-2</sup> for 60 h, ~20% decayed        |
| Co <sub>1</sub> /PCN <sup>17</sup>                          | Co (0.3 wt%)     | 1.0 M KOH                            | 138( $\eta_{10}$ )                     | 52                                  | i-t at -10 mA cm <sup>-2</sup> for 24 h, negligible decayed  |
| Co-D <sub>1</sub> T MoS <sub>2</sub> <sup>18</sup>          | Co (3.54 wt%)    | 0.5 M H <sub>2</sub> SO              | 42( $\eta_{10}$ )                      | 32                                  | i-t at -34 mA cm <sup>-2</sup> for 2.8 h,                    |

|                                                  |               |                                         |                    |       |                                                                                                                       |
|--------------------------------------------------|---------------|-----------------------------------------|--------------------|-------|-----------------------------------------------------------------------------------------------------------------------|
|                                                  |               |                                         |                    |       | negligible decayed                                                                                                    |
| MCM@Mo<br>S <sub>2</sub> -Ni <sup>19</sup>       | Ni (2.7 wt%)  | 0.5 M<br>H <sub>2</sub> SO <sub>4</sub> | 53( $\eta_{10}$ )  | 81    | i-t at ~62 mA<br>cm <sup>-2</sup> for 24 h,<br>slightly decayed                                                       |
| W-SAC <sup>20</sup>                              | W (1.21 wt%)  | 0.1 M<br>KOH                            | 85( $\eta_{10}$ )  | 53    | i-t at -10 mA<br>cm <sup>-2</sup> for 11.1 h,<br>~25% decayed                                                         |
| Pt <sub>1</sub> /N-C <sup>21</sup>               | Pt (2.5 wt%)  | 1.0 M<br>KOH                            | 46( $\eta_{10}$ )  | 36.8  | i-t at -10 mA<br>cm <sup>-2</sup> for 20 h,<br>negligible<br>decayed                                                  |
|                                                  |               | 0.5 M<br>H <sub>2</sub> SO <sub>4</sub> | 19( $\eta_{10}$ )  | 14.2  |                                                                                                                       |
| Ni <sub>5</sub> P <sub>4</sub> -Ru <sup>22</sup> | Ru (3.83 wt%) | 1.0 M<br>KOH                            | 54( $\eta_{10}$ )  | 52.0  | i-t at -20 mA<br>cm <sup>-2</sup> for 60 h,<br>than, at -35 mA<br>cm <sup>-2</sup> for 60 h,<br>negligible<br>decayed |
| 1Pt/VS <sub>2</sub> /CP<br><sub>23</sub>         | Pt (3.16 wt%) | 0.5 M<br>H <sub>2</sub> SO <sub>4</sub> | 77( $\eta_{10}$ )  | 40.13 | i-t at ~ -18 mA<br>cm <sup>-2</sup> for 12 h,<br>negligible<br>decayed                                                |
| Ru SAs/N-<br>Mo <sub>2</sub> C NSs <sup>24</sup> | Ru (2.61 wt%) | 1.0 M<br>KOH                            | 43( $\eta_{10}$ )  | 38.67 | i-t at ~ -150 mA<br>cm <sup>-2</sup> for 60 h,<br>slightly decayed                                                    |
| Co-SAC <sup>25</sup>                             | Co (0.29 at%) | 0.5 M<br>H <sub>2</sub> SO <sub>4</sub> | 230( $\eta_{10}$ ) | 99    | slightly decayed<br>after 1000 CV<br>cycles                                                                           |
| Ni-SAC <sup>25</sup>                             | Ni (0.30 at%) |                                         | 530( $\eta_{10}$ ) | 167   | N/A                                                                                                                   |
| W-SAV <sup>25</sup>                              | W (0.36 at%)  |                                         | 590( $\eta_{10}$ ) | 122   | N/A                                                                                                                   |
| CoSAs/PTF<br>-600 <sup>26</sup>                  | Co (0.85 wt%) | 0.5 M<br>H <sub>2</sub> SO <sub>4</sub> | 94( $\eta_{10}$ )  | 50    | N/A                                                                                                                   |
| CoN <sub>x</sub> /C <sup>27</sup>                | Co (0.14 wt%) | 1.0 M<br>KOH                            | 170( $\eta_{10}$ ) | 75    | N/A                                                                                                                   |
|                                                  |               | 0.5 M<br>H <sub>2</sub> SO <sub>4</sub> | 133( $\eta_{10}$ ) | 57    | slightly decayed<br>after 5000 CV<br>cycles                                                                           |
| Ni <sub>sa1.5</sub> -                            | Ni (5.01 at%) | 1.0 M                                   | 196( $\eta_{10}$ ) | 87    | i-t at ~ -10.90                                                                                                       |

|                                |  |     |  |  |                                                  |
|--------------------------------|--|-----|--|--|--------------------------------------------------|
| MoS <sub>2</sub> <sup>28</sup> |  | KOH |  |  | mA cm <sup>-2</sup> for 10 h, negligible decayed |
|--------------------------------|--|-----|--|--|--------------------------------------------------|

## References

1. Kresse, G.; Hafner, J., *Phys. Rev. B* **1993**, 47, 558-561.
2. Kresse, G.; Furthmüller, J., *Phys. Rev. B* **1996**, 54, 11169-11186.
3. Perdew, J. P.; Burke, K.; Ernzerhof, M., *Phys. Rev. Lett.* **1996**, 77 (18), 3865-3868.
4. Kresse, G.; Joubert, D., *Phys. Rev. B* **1999**, 59 (3), 1758-1775.
5. Baskin, Y.; Meyer, L., *Phys. Rev.* **1955**, 100 (2), 544-544.
6. Monkhorst, H. J.; Pack, J. D., *Phys. Rev. B* **1976**, 13 (12), 5188-5192.
7. Nørskova, J. K.; Bligaarda, T.; Logadottira, A.; Kitchin, J. R.; Chen, J. G.; Pandelov, S.; Stimming, U., *J. Electrochem. Soc.* **2005**, 152 (3), J23-J26.
8. Furthmüller, J.; Hafner, J.; Kresse, G., *Phys. Rev. B* **1994**, 50 (21), 15606-15622.
9. He Man-Chao, Z. J., *Chin. Phys. B* **2013**, 22 (1), 16802-016802.
10. Delley, B., *J. Chem. Phys.* **1990**, 92 (1), 508-517.
11. Delley, B., *J. Chem. Phys.* **2000**, 113 (18), 7756-7764.
12. Dassault Systèmes BIOVIA. Materials Studio, version 18.1.0.2017, <https://www.3dsbiovia.com/> **2018**.
13. Momma, K.; Izum, F., *J. Appl. Crystallogr.* **2011**, 44, 1272-1276.
14. Chen, W.; Pei, J.; He, C. T.; Wan, J.; Ren, H.; Zhu, Y.; Wang, Y.; Dong, J.; Tian, S.; Cheong, W. C., *Angew. Chem. Int. Ed.* **2017**, 56 (50), 16086-16090.
15. Cheng, Y.; Guo, H.; Li, X.; Wu, X.; Xu, X.; Zheng, L.; Song, R., *Chem. Eng. J.* **2021**, 410, 128359.
16. Xue, Y.; Huang, B.; Yi, Y.; Guo, Y.; Zuo, Z.; Li, Y.; Jia, Z.; Liu, H.; Li, Y., *Nature communications* **2018**, 9 (1), 1-10.
17. Cao, L.; Luo, Q.; Liu, W.; Lin, Y.; Liu, X.; Cao, Y.; Zhang, W.; Wu, Y.; Yang, J.; Yao, T., *Nature Catalysis* **2019**, 2 (2), 134-141.
18. Qi, K.; Cui, X.; Gu, L.; Yu, S.; Fan, X.; Luo, M.; Xu, S.; Li, N.; Zheng, L.; Zhang, Q., *Nature communications* **2019**, 10 (1), 1-9.
19. Zhang, H.; Yu, L.; Chen, T.; Zhou, W.; Lou, X. W., *Advanced Functional Materials* **2018**, 28 (51), 1807086.
20. Chen, W.; Pei, J.; He, C. T.; Wan, J.; Ren, H.; Wang, Y.; Dong, J.; Wu, K.; Cheong, W. C.; Mao, J., *Advanced Materials* **2018**, 30 (30), 1800396.
21. Fang, S.; Zhu, X.; Liu, X.; Gu, J.; Liu, W.; Wang, D.; Zhang, W.; Lin, Y.; Lu, J.; Wei, S., *Nature communications* **2020**, 11 (1), 1-8.
22. He, Q.; Tian, D.; Jiang, H.; Cao, D.; Wei, S.; Liu, D.; Song, P.; Lin, Y.; Song, L., *Advanced Materials* **2020**, 32 (11), 1906972.
23. Zhu, J.; Cai, L.; Yin, X.; Wang, Z.; Zhang, L.; Ma, H.; Ke, Y.; Du, Y.; Xi, S.; Wee, A. T., *ACS nano* **2020**, 14 (5), 5600-5608.
24. Yu, J.; Wang, A.; Yu, W.; Liu, X.; Li, X.; Liu, H.; Hu, Y.; Wu, Y.; Zhou, W., *Applied Catalysis B: Environmental* **2020**, 277, 119236.

25. Hossain, M. D.; Liu, Z.; Zhuang, M.; Yan, X.; Xu, G. L.; Gadre, C. A.; Tyagi, A.; Abidi, I. H.; Sun, C. J.; Wong, H., *Advanced Energy Materials* **2019**, 9 (10), 1803689.
26. Yi, J.-D.; Xu, R.; Chai, G.-L.; Zhang, T.; Zang, K.; Nan, B.; Lin, H.; Liang, Y.-L.; Lv, J.; Luo, J., *Journal of Materials Chemistry A* **2019**, 7 (3), 1252-1259.
27. Liang, H.-W.; Brüller, S.; Dong, R.; Zhang, J.; Feng, X.; Müllen, K., *Nature communications* **2015**, 6 (1), 1-8.
28. Zhang, X.; Liu, W.-X.; Zhou, Y.-W.; Meng, Z.-D.; Luo, L.; Liu, S.-Q., *Journal of Electroanalytical Chemistry* **2021**, 894, 115359.
